# Supplementary material for: Laquinimod attenuates inflammation by modulating macrophage functions in traumatic brain injury mouse model
Source: PubMed Central journal article supplement (PMC5791334; doi:10.1186/s12974-018-1075-y), 2018-01-30

A

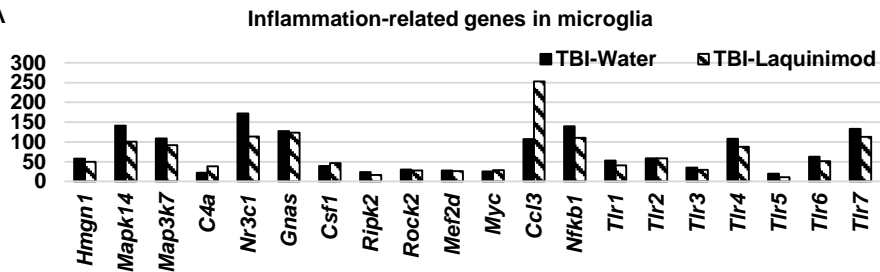

B

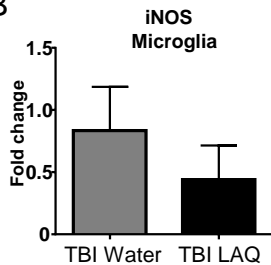

C

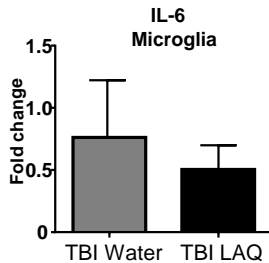

Supplement: 12974_2018_1075_MOESM1_ESM.pdf [file 12974_2018_1075_MOESM1_ESM.pdf]
